# Supplementary material
Source: PubMed Central journal article supplement (PMC10076227)
Supplement: NIHMS1786309-supplement-Supplement.pdf [file NIHMS1786309-supplement-Supplement.pdf]

## APPENDIX Contents

|                                                                                                                                                 |    |
|-------------------------------------------------------------------------------------------------------------------------------------------------|----|
| Detailed Description of Study Methods .....                                                                                                     | 2  |
| Appendix Exhibit 1A. Construction of Study Sample .....                                                                                         | 3  |
| Appendix Exhibit 2A. Data Sources .....                                                                                                         | 4  |
| Appendix Exhibit 3A. Excluded Counties.....                                                                                                     | 5  |
| Appendix Exhibit 4A. Definitions for Cause-Specific Kidney Failure and Stratified Analyses.....                                                 | 6  |
| Appendix Exhibit 5A. County-Level Characteristics of US Adult Population Age 18 and Older,<br>2000-2017 .....                                   | 7  |
| Appendix Exhibit 6A. Cause-Specific Kidney Failure Incidence Analyses .....                                                                     | 8  |
| Appendix Exhibit 7A. Stratified Analyses, by Sex .....                                                                                          | 9  |
| Appendix Exhibit 8A. Stratified Analyses, by Age Group.....                                                                                     | 10 |
| Appendix Exhibit 9A. Stratified Analyses, by Race or Ethnicity .....                                                                            | 11 |
| Appendix Exhibit 10A. County-Level Kidney Failure Incidence per Million by Poverty Level among<br>White, non-Hispanic Patients, 2000-2017 ..... | 12 |
| Appendix Exhibit 11A. County-Level Kidney Failure Incidence per Million by Poverty Level among<br>Black, non-Hispanic Patients, 2000-2017 ..... | 12 |
| Appendix Exhibit 12A. County-Level Kidney Failure Incidence per Million by Poverty Level among<br>Hispanic or Latino Patients, 2000-2017 .....  | 13 |
| Appendix Exhibit 13A. Stratified Analyses, by Treatment Modality.....                                                                           | 14 |
| Appendix Exhibit 14A. Alternative Model Specifications and Exposure Definitions.....                                                            | 15 |
| Appendix Exhibit 15A. Alternative Model Specifications for Time Period.....                                                                     | 16 |
| Appendix Exhibit 16A. Three-Way Interactions for Age .....                                                                                      | 17 |
| References .....                                                                                                                                | 18 |

## Detailed Description of Study Methods

### 1. Assignment of Incident Kidney Failure Patients to Counties

We used patient mailing addresses, as reported on the Medical Evidence Form (CMS 2728) to assign incident kidney failure patients to counties. For patients with incident kidney failure between January 1, 2000 and December 31, 2009, we used county boundaries from the 2000 Census. For patients with incident kidney failure between January 1, 2010 and December 31, 2017, we used county boundaries from the 2010 Census, because county lines can change over time. Between 2000 and 2010, six counties were created, four counties were deleted, and eight counties had substantial boundary changes.<sup>1</sup>

We used patient addresses to geocode and geolocate patients within counties using ArcGIS spatial mapping software, version 10.5.1 (ESRI). The Census Bureau provides cartographic boundary files for geographic information system (GIS) software. For addresses that could not be geocoded, ZIP codes were linked to ZIP Code Tabulation Areas (ZCTAs) with a crosswalk file. We then used a ZIP code-to-county crosswalk file developed by the Missouri Census Data Center’s Geographic Correspondence Engine.<sup>2</sup> Because it is possible for ZIP codes to cross county lines, the crosswalk includes a variable, “allocation factor,” which is the proportion of total ZCTA population that resides in the county. Most incident patients (96.1%) were assigned to a county either by geocoding their mailing address or on the basis of a one-to-one match with their ZIP code.

Incident patients living in ZCTAs that crossed county lines were assigned to the county where the majority of the ZCTA’s population resided (3.9%).

### 2. Assignment of Poverty Quintile

The US Census’ Small Area Income and Poverty Estimates data provides the county-level proportion of people living below poverty annually.<sup>3</sup> Poverty status compares total annual family income to federal poverty thresholds. Thresholds are dependent on total annual family income, family size, number of related children, and age of householder, and are updated annually by the Census Bureau. We assigned each county to a poverty quintile based on each year’s distribution of proportion of the population living below poverty. Quintiles were equal in size.

Below we present the mean (SD) county-level proportion of the population living below poverty for each quintile in each period.

| Quintile            | Overall (2000-2017) | Period 1 (2000-2005) | Period 2 (2006-2011) | Period 3 (2012-2017) |
|---------------------|---------------------|----------------------|----------------------|----------------------|
| 1 (Lowest Poverty)  | 8.4 (1.8)           | 7.4 (1.5)            | 8.7 (1.8)            | 9.0 (1.7)            |
| 2                   | 11.8 (1.3)          | 10.5 (0.8)           | 12.3 (1.1)           | 12.6 (1.0)           |
| 3                   | 14.6 (15.8)         | 13.0 (0.9)           | 15.2 (1.2)           | 15.6 (1.2)           |
| 4                   | 17.9 (1.9)          | 16.1 (1.3)           | 18.5 (1.4)           | 19.0 (1.4)           |
| 5 (Highest Poverty) | 24.9 (5.1)          | 22.5 (4.4)           | 25.7 (5.0)           | 26.4 (5.1)           |

## Appendix Exhibit 1A. Construction of Study Sample

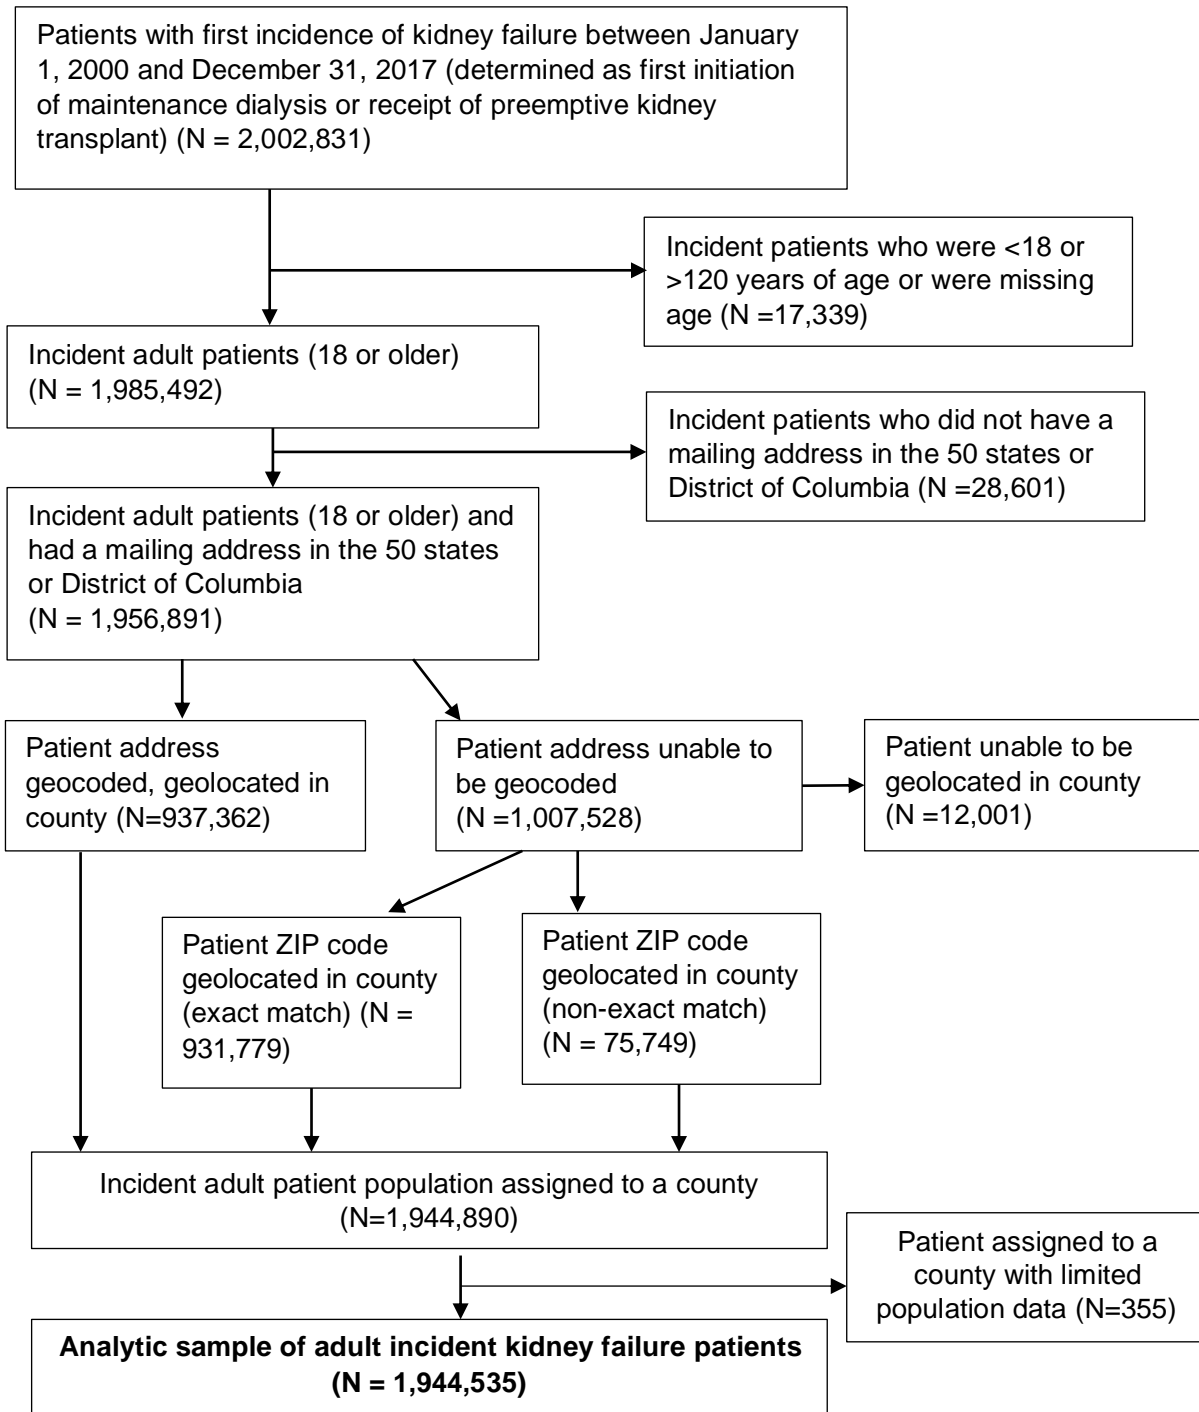

## Appendix Exhibit 2A. Data Sources

| Variable                                                                                                      | Data Source(s)                                                                                                                                                                                                 |
|---------------------------------------------------------------------------------------------------------------|----------------------------------------------------------------------------------------------------------------------------------------------------------------------------------------------------------------|
| <b>Numerator: Incident kidney failure cases</b>                                                               | End-Stage Renal Disease Medical Evidence Report (CMS 2728) <sup>4</sup>                                                                                                                                        |
| <b>Denominator: County-level population of adults 18 and older</b>                                            | 2000-2017 U.S. Census Bureau Annual County Population Estimates <sup>5</sup>                                                                                                                                   |
| <b>County-Level Characteristics</b>                                                                           |                                                                                                                                                                                                                |
| Percent of the population living below the poverty line                                                       | 2000-2017 Small Area Income and Poverty Estimates <sup>3</sup>                                                                                                                                                 |
| Percent of the population who are Hispanic                                                                    | 2000-2017 National Center for Health Statistics (NCHS) Bridged Race Files <sup>6,7</sup>                                                                                                                       |
| Percent of the population who are Black                                                                       | 2000-2017 NCHS Bridged Race Files <sup>6,7</sup>                                                                                                                                                               |
| Percent of the population who are Asian                                                                       | 2000-2017 NCHS Bridged Race Files <sup>6,7</sup>                                                                                                                                                               |
| Percent of the population who are American Indian or Alaska Native                                            | 2000-2017 NCHS Bridged Race Files <sup>6,7</sup>                                                                                                                                                               |
| Median household income                                                                                       | 2000-2017 Small Area Income and Poverty Estimates <sup>3</sup>                                                                                                                                                 |
| Urban-Rural continuum code                                                                                    | U.S. Department of Agriculture (2003 <sup>8</sup> and 2013 <sup>9</sup> )                                                                                                                                      |
| Educational attainment (percent of adults age 25 years and older with a high school diploma only)             | U.S. Census Bureau (2000), American Community Survey 5-Year File (2014-18). Estimates made available by the U.S. Department of Agriculture Economic Research Service <sup>10</sup>                             |
| Unemployment rate, age 16+                                                                                    | U.S. Bureau of Labor Statistics Local Area Unemployment Statistics (2000-2017) <sup>11</sup>                                                                                                                   |
| Uninsurance rate, adults age 18-64                                                                            | U.S. Census Small Area Health Insurance Estimates (2005-2017) <sup>12</sup>                                                                                                                                    |
| Diagnosed diabetes prevalence (proportion of adults age 20 or older who report a previous diabetes diagnosis) | Institute for Health Metrics and Evaluation (IHME) Diabetes prevalence by county (2000-2012) <sup>13</sup> , Centers for Disease Control and Prevention Diabetes Surveillance System (2013-2016) <sup>14</sup> |
| Doctors per 1,000 population                                                                                  | Health Resources and Services Administration Area Health Resource File (2000, 2005, 2010-2017) <sup>15</sup>                                                                                                   |
| Number of dialysis facilities per capita                                                                      | CMS Dialysis Compare (2001-2017) <sup>16</sup>                                                                                                                                                                 |

### Appendix Exhibit 3A. Excluded Counties

| State           | County or County Equivalent Name (FIPS Code)    | Total Incident Kidney Failure Patients Excluded * | Average Annual Adult Population, Mean (SD) |                              |
|-----------------|-------------------------------------------------|---------------------------------------------------|--------------------------------------------|------------------------------|
| <b>Alaska</b>   | Hoonah-Angoon Census Area (02105)               | 355                                               | 3,114 (2,538)                              |                              |
|                 | Petersburg Borough (02195)                      |                                                   |                                            |                              |
|                 | Prince of Wales-Hyder Census Area (02198)       |                                                   |                                            |                              |
|                 | Prince of Wales-Outer Ketchikan Borough (02201) |                                                   |                                            |                              |
|                 | Skagway Municipality (02230)                    |                                                   |                                            |                              |
|                 | Wade Hampton Census Area (02270)                |                                                   |                                            |                              |
|                 | Wrangell City and Borough (02275)               |                                                   |                                            |                              |
|                 | Wangell-Petersburg Borough (02280)              |                                                   |                                            |                              |
|                 | <b>Hawaii</b>                                   |                                                   |                                            | Kalawao (15005)              |
|                 | <b>South Dakota</b>                             |                                                   |                                            | Oglala Lakota County (46102) |
| Shannon (46113) |                                                 |                                                   |                                            |                              |
| <b>Virginia</b> | Bedford City (51515)                            |                                                   |                                            |                              |

**Note .** \* County-level count of incident kidney failure patients not included due to small numbers.

## Appendix Exhibit 4A. Definitions for Cause-Specific Kidney Failure and Stratified Analyses

| <b>Cause-Specific Analyses</b>                 | <b>Numerator</b>                                                                                              | <b>Denominator</b>                                |
|------------------------------------------------|---------------------------------------------------------------------------------------------------------------|---------------------------------------------------|
| <i>Diabetes or Hypertension</i>                | County-level incident kidney failure cases where primary cause of kidney failure was diabetes or hypertension | County-level adult population                     |
| <i>Diabetes Only</i>                           | County-level incident kidney failure cases where primary cause of kidney failure was diabetes                 | County-level adult population                     |
| <i>Hypertension Only</i>                       | County-level incident kidney failure cases where primary cause of kidney failure was hypertension             | County-level adult population                     |
| <i>Other Primary Cause Only</i>                | County-level incident kidney failure cases where primary cause was not diabetes or hypertension               | County-level adult population                     |
| <b>Stratified Analyses</b>                     | <b>Numerator</b>                                                                                              | <b>Denominator</b>                                |
| <b>Age</b>                                     |                                                                                                               |                                                   |
| <i>Age 18-44 Only</i>                          | County-level incident kidney failure cases among adults age 18-44                                             | County-level population age 18-44                 |
| <i>Age 45-64 Only</i>                          | County-level incident kidney failure cases among adults age 45-64                                             | County-level population age 45-64                 |
| <i>Age 65-74 Only</i>                          | County-level incident kidney failure cases among adults age 65-74                                             | County-level population age 65-74                 |
| <i>Age 75+ Only</i>                            | County-level incident kidney failure cases among adults age 75+                                               | County-level population age 75+                   |
| <b>Sex</b>                                     |                                                                                                               |                                                   |
| <i>Men</i>                                     | County-level incident kidney failure cases among adult men                                                    | County-level adult male population                |
| <i>Women</i>                                   | County-level incident kidney failure cases among adult women                                                  | County-level adult female population              |
| <b>Race or Ethnicity</b>                       |                                                                                                               |                                                   |
| <i>White, non-Hispanic Only</i>                | County-level incident kidney failure cases among White, non-Hispanic adults                                   | County-level White, non-Hispanic adult population |
| <i>Black, non-Hispanic Only</i>                | County-level incident kidney failure cases among Black, non-Hispanic adults                                   | County-level Black, non-Hispanic adult population |
| <i>Hispanic or Latino Only</i>                 | County-level incident kidney failure cases among Hispanic or Latino adults                                    | County-level Hispanic or Latino adult population  |
| <b>Treatment Modality</b>                      |                                                                                                               |                                                   |
| <i>Excluding preemptive kidney transplants</i> | County-level incident kidney failure cases where maintenance dialysis was initiated                           | County-level adult population                     |

**Appendix Exhibit 5A. County-Level Characteristics of US Adult Population Age 18 and Older, 2000-2017**

| Characteristic, Mean(SD)                                          | Period 1<br>(2000-2005) | Period 2<br>(2006-2011) | Period 3<br>(2012-2017) | p-value |
|-------------------------------------------------------------------|-------------------------|-------------------------|-------------------------|---------|
| <b>Number of counties</b>                                         | 3,134                   | 3,139                   | 3,141                   | -       |
| <b>Total annual population</b>                                    | 68,855<br>(221,137)     | 73,684<br>(233,942)     | 78,289<br>(250,323)     | -       |
| <b>Age Category, %</b>                                            |                         |                         |                         |         |
| 18-44                                                             | 47.2 (7.1)              | 43.7 (7.2)              | 41.8 (7.0)              |         |
| 45-64                                                             | 33.1 (3.6)              | 36.0 (3.7)              | 35.4 (3.2)              | <0.01   |
| 65-74                                                             | 10.2 (2.4)              | 10.7 (2.5)              | 12.9 (2.9)              | <0.01   |
| 75 or older                                                       | 9.5 (3.1)               | 9.6 (3.0)               | 9.9 (2.8)               | <0.01   |
| <b>Female, %</b>                                                  | 50.9 (2.6)              | 50.6 (2.7)              | 50.3 (2.8)              | <0.01   |
| <b>Race/Ethnicity, %</b>                                          |                         |                         |                         |         |
| White, non-Hispanic                                               | 83.0 (18.1)             | 82.1 (19.0)             | 79.8 (19.2)             | <0.01   |
| Black, non-Hispanic                                               | 8.4 (13.7)              | 8.7 (14.0)              | 9.0 (14.0)              | <0.01   |
| Hispanic or Latino                                                | 6.0 (11.6)              | 7.0 (12.3)              | 7.9 (12.7)              | <0.01   |
| American Indian, non-Hispanic                                     | 1.7 (6.7)               | 1.8 (6.9)               | 1.9 (7.2)               | <0.01   |
| Asian or Pacific Islander, non-Hispanic                           | 1.0 (2.9)               | 1.3 (3.1)               | 1.5 (3.3)               | <0.01   |
| <b>Percent below the poverty level, %</b>                         | 13.9 (5.6)              | 16.0 (6.3)              | 16.5 (6.4)              | <0.01   |
| <b>Unemployment rate, %</b>                                       | 5.4 (1.9)               | 7.1 (3.2)               | 6.1 (2.5)               | <0.01   |
| <b>Uninsurance rate, %</b>                                        | 18.0 (6.1)              | 18.1 (5.8)              | 14.0 (5.9)              | <0.01   |
| <b>High school graduate, %</b>                                    | 34.7 (6.6)              | 34.6 (6.8)              | 34.4 (7.1)              | <0.01   |
| <b>Urban/rural designation, %</b>                                 |                         |                         |                         |         |
| Counties in metropolitan areas of 1 million population or more    | 13.2 (33.9)             | 13.3 (34.0)             | 13.8 (34.4)             | 0.12    |
| Counties in metropolitan areas of 250,000 to 1 million population | 10.4 (30.5)             | 10.6 (30.8)             | 12.0 (32.5)             | <0.01   |
| Counties in metropolitan areas of fewer than 250,000 population   | 11.2 (31.5)             | 11.2 (31.5)             | 11.3 (31.7)             | 0.67    |
| Urban population of 20,000-49,999                                 | 10.3 (30.4)             | 10.3 (30.4)             | 9.7 (30.0)              | 0.07    |
| Urban population of 2,500-19,999                                  | 33.7 (47.3)             | 33.7 (47.3)             | 32.7 (46.9)             | 0.03    |
| Completely rural or less than 2,500 urban population              | 21.3 (40.9)             | 21.3 (40.9)             | 20.5 (40.4)             | 0.07    |
| <b>Diagnosed diabetes, %</b>                                      | 8.0 (1.8)               | 9.8 (2.0)               | 10.1 (2.9)              | <0.01   |
| <b>Number of dialysis facilities per county (n)</b>               | 1.3 (3.9)               | 1.6 (4.8)               | 1.9 (5.9)               | <0.01   |
| <b>Number of active physicians per 1,000 persons</b>              | 1.2 (1.4)               | 1.2 (1.5)               | 1.2 (1.6)               | 0.80    |

**Note:** Some group percentages may exceed 100% because of rounding.

## Appendix Exhibit 6A. Cause-Specific Kidney Failure Incidence Analyses

|                                         | Period 1<br>(2000-2005) | Period 2<br>(2006-2011) | Period 3<br>(2012-2017) | Adjusted Change in Disparity<br>from Period 3 to Period 1<br>(95%CI)* | P-<br>Value |
|-----------------------------------------|-------------------------|-------------------------|-------------------------|-----------------------------------------------------------------------|-------------|
| <i>Main Model</i>                       |                         |                         |                         |                                                                       |             |
| Highest Quintile of Poverty             | 494.0                   | 501.9                   | 532.6                   | 38.6 (12.3, 64.8)                                                     | <0.01       |
| Lowest Quintile of Poverty              | 451.2                   | 435.2                   | 432.5                   | -18.7 (-29.3, -8.1)                                                   |             |
| Difference between High and Low Poverty | 42.8                    | 66.6                    | 100.1                   | 57.3 (30.2, 84.4)                                                     |             |
| <i>Diabetes or Hypertension Only</i>    |                         |                         |                         |                                                                       |             |
| High Poverty                            | 371.0                   | 399.3                   | 416.8                   | 45.8 (23.8, 67.9)                                                     | <0.01       |
| Low Poverty                             | 311.4                   | 307.7                   | 304.9                   | -6.5 (-15.9, 2.9)                                                     |             |
| Difference between High and Low Poverty | 59.6                    | 91.6                    | 111.9                   | 52.3 (31.2, 73.4)                                                     |             |
| <i>Diabetes Only</i>                    |                         |                         |                         |                                                                       |             |
| High Poverty                            | 246.9                   | 265.9                   | 268.0                   | 21.0 (2.5, 39.6)                                                      | <0.01       |
| Low Poverty                             | 193.4                   | 186.4                   | 184.3                   | -9.1 (-15.3, -2.9)                                                    |             |
| Difference between High and Low Poverty | 53.5                    | 79.5                    | 83.6                    | 30.1 (12.5, 47.8)                                                     |             |
| <i>Hypertension Only</i>                |                         |                         |                         |                                                                       |             |
| High Poverty                            | 124.1                   | 133.4                   | 148.8                   | 24.8 (15.1, 34.4)                                                     | <0.01       |
| Low Poverty                             | 118.0                   | 121.2                   | 120.6                   | 2.6 (-3.6, 8.9)                                                       |             |
| Difference between High and Low Poverty | 6.1                     | 12.2                    | 28.2                    | 22.2 (12.2, 32.2)                                                     |             |
| <i>Other Primary Cause Only</i>         |                         |                         |                         |                                                                       |             |
| High Poverty                            | 142.1                   | 145.2                   | 133.8                   | -8.3 (-17.8, 1.3)                                                     | 0.86        |
| Low Poverty                             | 121.5                   | 123.7                   | 114.1                   | -7.3 (-11.8, -2.8)                                                    |             |
| Difference between High and Low Poverty | 20.6                    | 21.5                    | 19.7                    | -0.9 (-11.4, 9.5)                                                     |             |

**Note.** \* Estimates reflect change in kidney failure incidence per million over time between low- and high-poverty counties. Models include indicators for poverty quintile, period, and their interaction (poverty quintile\*period), as well as age, sex, county-level proportions of the population that are Black, Hispanic/Latino, Asian, or American Indian/Native American, county-level sociodemographic characteristics (e.g., urban/rural designation, uninsurance rate, unemployment rate, and educational attainment, county-level number of dialysis facilities per capita and number of active non-federal physicians per 1,000 population. All models are weighted by the county's adult population. Standard errors are clustered at the county level. Kidney failure due to diabetes was defined using ICD-9 codes 250.40 and 250.41 and ICD-10 codes E10.22, E10.29, E11.22, and E11.29). Incident patients with kidney failure due to hypertension was defined using ICD-9 code 40391 and ICD-10 code I12.9.



## Appendix Exhibit 7A. Stratified Analyses, by Sex

|                                         | Period 1<br>(2000-2005) | Period 2<br>(2006-2011) | Period 3<br>(2012-2017) | Adjusted Change in Disparity<br>from Period 3 to Period 1<br>(95%CI)* | P-<br>Value |
|-----------------------------------------|-------------------------|-------------------------|-------------------------|-----------------------------------------------------------------------|-------------|
| <i>Main Model</i>                       |                         |                         |                         |                                                                       |             |
| Highest Quintile of Poverty             | 494.0                   | 501.9                   | 532.6                   | 38.6 (12.3, 64.8)                                                     | <0.01       |
| Lowest Quintile of Poverty              | 451.2                   | 435.2                   | 432.5                   | -18.7 (-29.3, -8.1)                                                   |             |
| Difference between High and Low Poverty | 42.8                    | 66.6                    | 100.1                   | 57.3 (30.2 84.4)                                                      |             |
| <i>Men Only</i>                         |                         |                         |                         |                                                                       |             |
| High Poverty                            | 556.6                   | 583.8                   | 610.5                   | 53.9 (24.7, 83.1)                                                     | <0.01       |
| Low Poverty                             | 525.6                   | 510.0                   | 503.5                   | -22.1 (-35.5, -8.7)                                                   |             |
| Difference between High and Low Poverty | 31.0                    | 73.8                    | 107.0                   | 76.0 (45.3, 106.7)                                                    |             |
| <i>Women Only</i>                       |                         |                         |                         |                                                                       |             |
| High Poverty                            | 433.9                   | 426.6                   | 460.3                   | 26.3 (0.1, 52.6)                                                      | <0.01       |
| Low Poverty                             | 379.6                   | 364.4                   | 364.8                   | -14.8 (-25.7, -3.9)                                                   |             |
| Difference between High and Low Poverty | 54.3                    | 62.2                    | 95.5                    | 41.1 (14.9, 67.4)                                                     |             |

**Note.** \* Estimates reflect change in kidney failure incidence per million over time between low- and high-poverty counties. Models include indicators for poverty quintile, period, and their interaction (poverty quintile\*period), as well as age, county-level proportions of the population that are Black, Hispanic/Latino, Asian, or American Indian/Native American, county-level sociodemographic characteristics (e.g., urban/rural designation, uninsurance rate, unemployment rate, and educational attainment, county-level prevalence of diagnosed diabetes, county-level number of dialysis facilities per capita and number of active non-federal physicians per 1,000 population. All models are weighted by the county's adult population. Standard errors are clustered at the county level.

## Appendix Exhibit 8A. Stratified Analyses, by Age Group

|                                         | Period 1<br>(2000-2005) | Period 2<br>(2006-2011) | Period 3<br>(2012-2017) | Adjusted Change in Disparity<br>from Period 3 to Period 1<br>(95%CI)* | P-<br>Value |
|-----------------------------------------|-------------------------|-------------------------|-------------------------|-----------------------------------------------------------------------|-------------|
| <i>Main Model</i>                       |                         |                         |                         |                                                                       |             |
| Highest Quintile of Poverty             | 494.0                   | 501.9                   | 532.6                   | 38.6 (12.3, 64.8)                                                     | <0.01       |
| Lowest Quintile of Poverty              | 451.2                   | 435.2                   | 432.5                   | -18.7 (-29.3, -8.1)                                                   |             |
| Difference between High and Low Poverty | 42.8                    | 66.6                    | 100.1                   | 57.3 (30.2, 84.4)                                                     |             |
| <i>Age 18-44 Only</i>                   |                         |                         |                         |                                                                       |             |
| High Poverty                            | 122.9                   | 121.8                   | 131.6                   | 8.7 (-2.7, 20.2)                                                      | 0.20        |
| Low Poverty                             | 112.5                   | 108.0                   | 113.3                   | 0.8 (-4.0, 5.6)                                                       |             |
| Difference between High and Low Poverty | 10.3                    | 13.8                    | 18.3                    | 7.9 (-4.3, 20.1)                                                      |             |
| <i>Age 45-64 Only</i>                   |                         |                         |                         |                                                                       |             |
| High Poverty                            | 626.2                   | 611.4                   | 667.6                   | 41.4 (-1.2, 84.0)                                                     | 0.10        |
| Low Poverty                             | 478.2                   | 460.0                   | 483.7                   | 5.5 (-9.4, 20.4)                                                      |             |
| Difference between High and Low Poverty | 148.0                   | 151.4                   | 183.8                   | 35.8 (-6.8, 78.5)                                                     |             |
| <i>Age 65-74 Only</i>                   |                         |                         |                         |                                                                       |             |
| High Poverty                            | 1273.4                  | 1285.6                  | 1298.7                  | 25.3 (-47.8, 98.3)                                                    | 0.07        |
| Low Poverty                             | 1199.8                  | 1152.2                  | 1155.4                  | -44.4 (-81.5, -7.3)                                                   |             |
| Difference between High and Low Poverty | 73.6                    | 133.5                   | 143.3                   | 69.7 (-6.1, 145.4)                                                    |             |
| <i>Age 75+ Only</i>                     |                         |                         |                         |                                                                       |             |
| High Poverty                            | 1414.8                  | 1467.0                  | 1432.8                  | 18.0 (-64.7, 100.7)                                                   | 0.02        |
| Low Poverty                             | 1485.3                  | 1506.7                  | 1397.2                  | -88.1 (-139.8, -36.4)                                                 |             |
| Difference between High and Low Poverty | -70.5                   | -39.7                   | 35.6                    | 106.1 (16.8, 195.5)                                                   |             |

**Note.** \*Estimates reflect change in kidney failure incidence per million over time between low- and high-poverty counties. Models include indicators for poverty quintile, period, and their interaction (poverty quintile\*period), as well as sex, county-level proportions of the population that are Black, Hispanic/Latino, Asian, or American Indian/Native American, county-level sociodemographic characteristics (e.g., urban/rural designation, uninsurance rate, unemployment rate, and educational attainment), county-level prevalence of diagnosed diabetes, county-level number of dialysis facilities per capita and number of active non-federal physicians per 1,000 population. All models are weighted by the county's adult population. Standard errors are clustered at the county level.

## Appendix Exhibit 9A. Stratified Analyses, by Race or Ethnicity

|                                         | Period 1<br>(2000-2005) | Period 2<br>(2006-2011) | Period 3<br>(2012-2017) | Adjusted Change in Disparity<br>from Period 3 to Period 1<br>(95%CI)* | P-<br>Value |
|-----------------------------------------|-------------------------|-------------------------|-------------------------|-----------------------------------------------------------------------|-------------|
| <i>Main Model</i>                       |                         |                         |                         |                                                                       |             |
| Highest Quintile of Poverty             | 494.0                   | 501.9                   | 532.6                   | 38.6 (12.3, 64.8)                                                     | <0.01       |
| Lowest Quintile of Poverty              | 451.2                   | 435.2                   | 432.5                   | -18.7 (-29.3, -8.1)                                                   |             |
| Difference between High and Low Poverty | 42.8                    | 66.6                    | 100.1                   | 57.3 (30.2, 84.4)                                                     |             |
| <i>White, Non-Hispanic Only</i>         |                         |                         |                         |                                                                       |             |
| High Poverty                            | 398.3                   | 389.9                   | 431.9                   | 33.6 (13.5, 53.8)                                                     | <0.01       |
| Low Poverty                             | 363.5                   | 344.7                   | 333.8                   | -29.7 (-25.4, -12.2)                                                  |             |
| Difference between High and Low Poverty | 34.8                    | 45.2                    | 98.2                    | 63.3 (43.4, 83.3)                                                     |             |
| <i>Black, Non-Hispanic Only</i>         |                         |                         |                         |                                                                       |             |
| High Poverty                            | 1058.9                  | 1060.9                  | 1072.6                  | 13.7 (-35.4, 62.9)                                                    | 0.23        |
| Low Poverty                             | 1006.7                  | 1024.5                  | 982.2                   | -24.5 (-68.0, 19.0)                                                   |             |
| Difference between High and Low Poverty | 52.2                    | 36.4                    | 90.4                    | 38.2 (-23.4, 99.8)                                                    |             |
| <i>Hispanic or Latino</i>               |                         |                         |                         |                                                                       |             |
| High Poverty                            | 438.9                   | 484.4                   | 517.4                   | 78.5 (-8.8, 165.8)                                                    | 0.02        |
| Low Poverty                             | 393.2                   | 377.9                   | 360.1                   | -33.1 (-63.5, -2.8)                                                   |             |
| Difference between High and Low Poverty | 45.7                    | 106.5                   | 157.3                   | 111.6 (20.2, 203.2)                                                   |             |

**Note.** \* Estimates reflect change in kidney failure incidence per million over time between low- and high-poverty counties. Models include indicators for poverty quintile, period, and their interaction (poverty quintile\*period), as well as age, sex, county-level sociodemographic characteristics (e.g., urban/rural designation, uninsurance rate, unemployment rate, and educational attainment, county-level prevalence of diagnosed diabetes, county-level number of dialysis facilities per capita, and number of active non-federal physicians per 1,000 population. All models are weighted by the county's adult population for each race or ethnicity. Standard errors are clustered at the county level.

**Appendix Exhibit 10A. County-Level Kidney Failure Incidence per Million by Poverty Level among White, non-Hispanic Patients, 2000-2017**

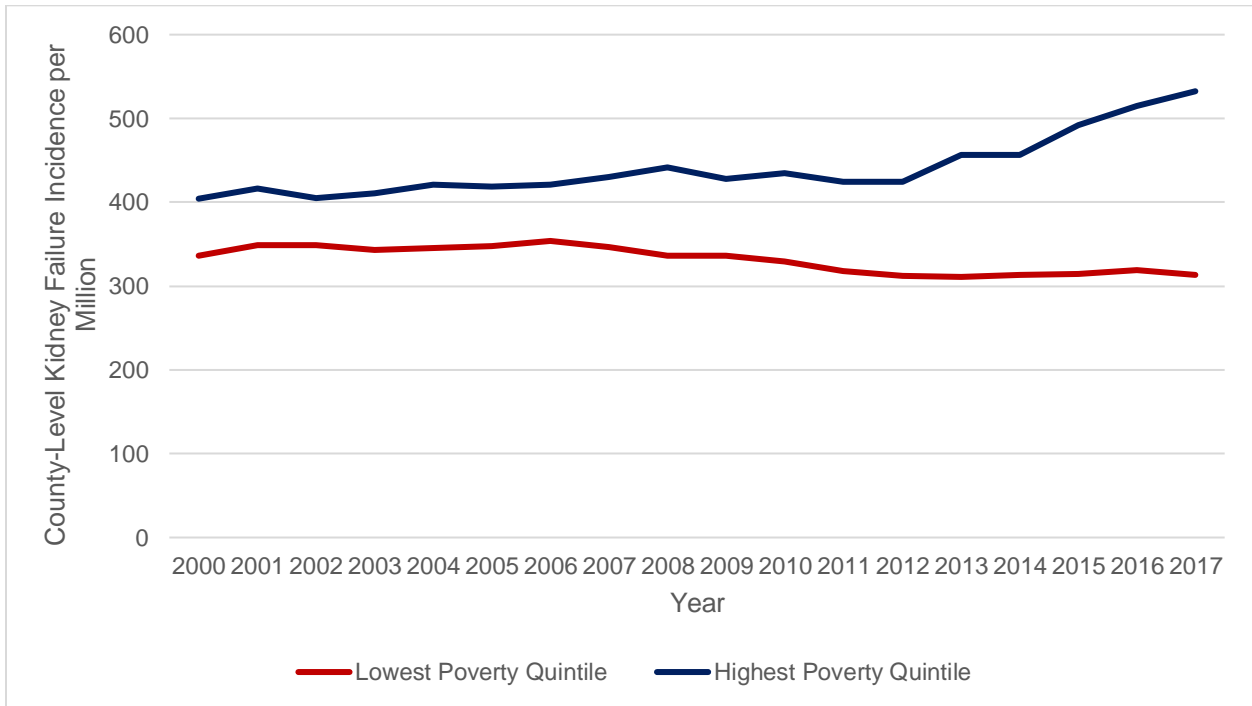

**Note.** Estimates are age-sex adjusted.

**Appendix Exhibit 11A. County-Level Kidney Failure Incidence per Million by Poverty Level among Black, non-Hispanic Patients, 2000-2017**

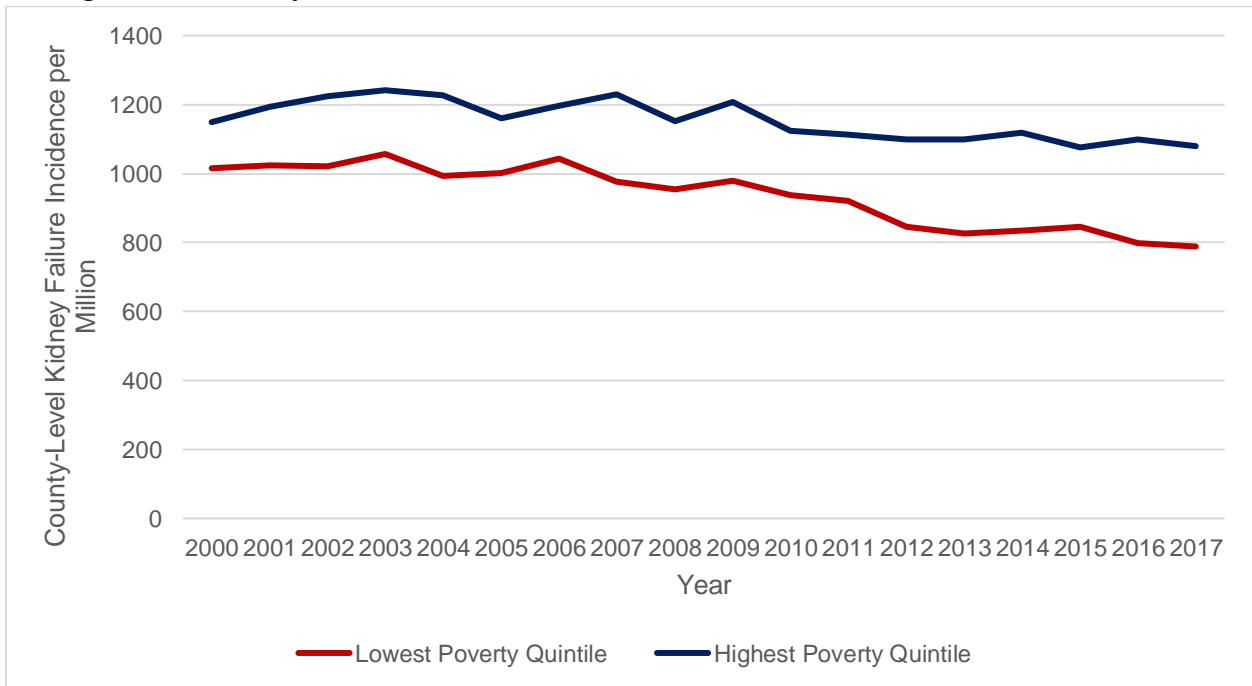

**Note.** Estimates are age-sex adjusted.

**Appendix Exhibit 12A. County-Level Kidney Failure Incidence per Million by Poverty Level among Hispanic or Latino Patients, 2000-2017**

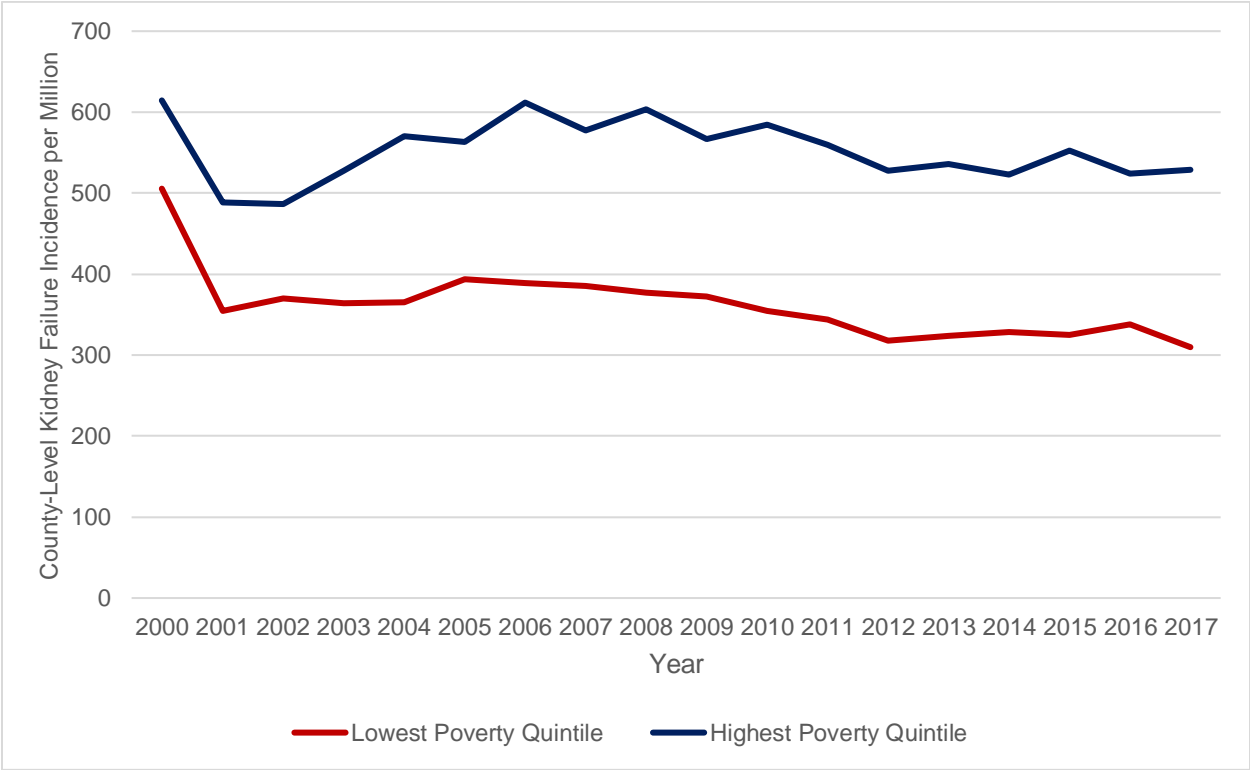

**Note.** Estimates are age-sex adjusted.

### Appendix Exhibit 13A. Stratified Analyses, by Treatment Modality

|                                                | Period<br>1<br>(2000-<br>2005) | Period<br>2<br>(2006-<br>2011) | Period<br>3<br>(2012-<br>2017) | Adjusted Change in<br>Disparity<br>from Period 3 to<br>Period 1<br>(95%CI)* | P-<br>Value |
|------------------------------------------------|--------------------------------|--------------------------------|--------------------------------|-----------------------------------------------------------------------------|-------------|
| <i>Main Model</i>                              |                                |                                |                                |                                                                             |             |
| Highest Quintile of Poverty                    | 494.0                          | 501.9                          | 532.6                          | 38.6 (12.3, 64.8)                                                           | <0.01       |
| Lowest Quintile of Poverty                     | 451.2                          | 435.2                          | 432.5                          | -18.7 (-29.3, -8.1)                                                         |             |
| Difference between High and Low Poverty        | 42.8                           | 66.6                           | 100.1                          | 57.3 (30.2 84.4)                                                            |             |
| <i>Excluding preemptive kidney transplants</i> |                                |                                |                                |                                                                             |             |
| High Poverty                                   | 488.2                          | 492.3                          | 524.4                          | 36.2 (10.2, 62.1)                                                           | <0.01       |
| Low Poverty                                    | 441.6                          | 422.7                          | 421.8                          | -19.9 (-30.4, -9.3)                                                         |             |
| Difference between High and Low Poverty        | 46.5                           | 69.6                           | 102.6                          | 56.1 (29.2, 82.9)                                                           |             |

**Note.** \*Coefficients reflect change in kidney failure incidence per million over time between low- and high-poverty counties. Models include indicators for poverty quintile, period, and their interaction (poverty quintile\*period), as well as age, sex, county-level proportions of the population that are Black, Hispanic/Latino, Asian, or American Indian/Native American, county-level sociodemographic characteristics (e.g., urban/rural designation, uninsurance rate, unemployment rate, and educational attainment, county-level prevalence of diagnosed diabetes, county-level number of dialysis facilities per capita and number of active non-federal physicians per 1,000 population. All models are weighted by the county's adult population. Standard errors are clustered at the county level.

## Appendix Exhibit 14A. Alternative Model Specifications and Exposure Definitions

|                                                                   | Adjusted Change in<br>Disparity<br>from Period 3 to<br>Period 1<br>(95%CI)* | P-<br>Value |
|-------------------------------------------------------------------|-----------------------------------------------------------------------------|-------------|
| <b>Main Model</b>                                                 | 57.3 (30.2, 84.4)                                                           | <0.01       |
| <b>Alternative Exposure Definitions</b>                           |                                                                             |             |
| <i>Proportion of Households Living Below Poverty</i>              | 3.8 (2.7, 5.0)                                                              | <0.01       |
| <i>Poverty Quintile Fixed in 2000</i>                             | 60.3 (36.6, 83.9)                                                           | <0.01       |
| <i>Poverty Quintile Assigned by Period, Rather than Annually</i>  | 69.9 (33.1, 100.7)                                                          | <0.01       |
| <b>Alternative Model Specifications</b>                           |                                                                             |             |
| <i>Main Model, adding county-level median income as covariate</i> | 71.8 (46.5, 97.1)                                                           | <0.01       |
| <i>Included county fixed effects</i>                              | 35.2 (16.8, 55.6)                                                           | <0.01       |
| <i>Included county and year fixed effects</i>                     | 37.2 (18.7, 55.7)                                                           | <0.01       |

**Notes.** \* Estimates reflect change in kidney failure incidence per million over time between low- and high-poverty counties. Models include indicators for poverty quintile, period, and their interaction (poverty quintile\*period), as well as age, sex, county-level proportions of the population that are Black, Hispanic/Latino, Asian, or American Indian/Native American, county-level sociodemographic characteristics (e.g., urban/rural designation, uninsurance rate, unemployment rate, and educational attainment, county-level prevalence of diagnosed diabetes, county-level number of dialysis facilities per capita and number of active non-federal physicians per 1,000 population. All models are weighted by the county's adult population. Standard errors are clustered at the county level.

## Appendix Exhibit 15A. Alternative Model Specifications for Time Period

|                                                                  | Period 1<br>(2000-2005) | Period 2<br>(2006-2011) | Period 3<br>(2012-2017) | Adjusted Change in Disparity<br>from Period 3 to Period 1<br>(95%CI)* | P-<br>Value |
|------------------------------------------------------------------|-------------------------|-------------------------|-------------------------|-----------------------------------------------------------------------|-------------|
| <i>Main Model: Comparing Period 3 to Period 1</i>                |                         |                         |                         |                                                                       |             |
| Highest Quintile of Poverty                                      | 494.0                   | 501.9                   | 532.6                   | 38.6 (12.3, 64.8)                                                     | <0.01       |
| Lowest Quintile of Poverty                                       | 451.2                   | 435.2                   | 432.5                   | -18.7 (-29.3, -8.1)                                                   |             |
| Difference between High and Low Poverty                          | 42.8                    | 66.6                    | 100.1                   | 57.3 (30.2, 84.4)                                                     |             |
|                                                                  | Period 1<br>(2000-2005) | Period 2<br>(2006-2011) | Period 3<br>(2012-2017) | Adjusted Change in Disparity<br>from Period 3 to Period 2<br>(95%CI)* | P-<br>Value |
| <i>Alternative Specification: Comparing Period 3 to Period 2</i> |                         |                         |                         |                                                                       |             |
| High Poverty                                                     | 494.0                   | 501.9                   | 532.6                   | 30.7 (16.4, 45.0)                                                     | <0.01       |
| Low Poverty                                                      | 451.2                   | 435.2                   | 432.5                   | -2.8 (-11.8, 6.2)                                                     |             |
| Difference between High and Low Poverty                          | 42.8                    | 66.6                    | 100.1                   | 33.5 (17.4, 49.5)                                                     |             |
|                                                                  | Period 1<br>(2000-2005) | Period 2<br>(2006-2011) | Period 3<br>(2012-2017) | Adjusted Change in Disparity<br>from Period 2 to Period 1<br>(95%CI)* | P-<br>Value |
| <i>Alternative Specification: Comparing Period 2 to Period 1</i> |                         |                         |                         |                                                                       |             |
| High Poverty                                                     | 494.0                   | 501.9                   | 532.6                   | 7.9 (-13.2, 29.0)                                                     | 0.03        |
| Low Poverty                                                      | 451.2                   | 435.2                   | 432.5                   | -15.9 (-22.9, 8.9)                                                    |             |
| Difference between High and Low Poverty                          | 42.8                    | 66.6                    | 100.1                   | 23.8 (2.0, 45.6)                                                      |             |

**Note:** \* Estimates reflect change in kidney failure incidence per million over time between low- and high-poverty counties. Models include indicators for poverty quintile, period, and their interaction (poverty quintile\*period), as well as age, sex, county-level proportions of the population that are Black, Hispanic/Latino, Asian, or American Indian/Native American, county-level sociodemographic characteristics (e.g., urban/rural designation, uninsurance rate, unemployment rate, and educational attainment, county-level prevalence of diagnosed diabetes, county-level number of dialysis facilities per capita and number of active non-federal physicians per 1,000 population. All models are weighted by the county's adult population. Standard errors are clustered at the county level.



## Appendix Exhibit 16A. Three-Way Interactions for Age

|                                         | Period 1<br>(2000-2005) | Period 2<br>(2006-2011) | Period 3<br>(2012-2017) | P-Value |
|-----------------------------------------|-------------------------|-------------------------|-------------------------|---------|
| <i>Main Model</i>                       |                         |                         |                         |         |
| Highest Quintile of Poverty             | 494.0                   | 501.9                   | 532.6                   | <0.01   |
| Lowest Quintile of Poverty              | 451.2                   | 435.2                   | 432.5                   |         |
| Difference between High and Low Poverty | 42.8                    | 66.6                    | 100.1                   |         |
| <b>Age (Age 18-64 vs. 65 and older)</b> |                         |                         |                         |         |
| <i>Age 18-64</i>                        |                         |                         |                         |         |
| Highest Quintile of Poverty             | 250.2                   | 262.5                   | 301.4                   | Ref     |
| Lowest Quintile of Poverty              | 269.4                   | 265.2                   | 294.0                   |         |
| Difference between High and Low Poverty | -19.1                   | -2.7                    | 7.4                     |         |
| <i>Age 65 and older</i>                 |                         |                         |                         |         |
| Highest Quintile of Poverty             | 1622.9                  | 1593.3                  | 1519.2                  | 0.02    |
| Lowest Quintile of Poverty              | 1328.0                  | 1300.6                  | 1152.0                  |         |
| Difference between High and Low Poverty | 292.9                   | 292.7                   | 367.2                   |         |

**Note:** Estimates presented are marginal effects. Models with three-way interaction for age group include an indicator for poverty quintile, period, age group (18-64 vs. 65 and older), and their interaction (poverty quintile\*period\*65 or older). All models include indicators for age, sex, county-level proportions of the population that are Black, Hispanic/Latino, Asian, or American Indian/Native American, county-level sociodemographic characteristics (e.g., urban/rural designation, uninsurance rate, unemployment rate, and educational attainment, county-level prevalence of diagnosed diabetes, county-level number of dialysis facilities per capita and number of active non-federal physicians per 1,000 population. All models are weighted by the county's adult population. Standard errors are clustered at the county level.

## References

1. US Census Bureau. Substantial Changes to Counties and County Equivalent Entities: 1970-Present. <https://www.census.gov/programs-surveys/geography/technical-documentation/county-changes.html>. Accessed August 28, 2020.
2. Missouri Census Data Center. MABLE/Geocorr [14]: Geographic Correspondence Engine. 2016; <http://mcdc.missouri.edu/applications/geocorr2014.html>.
3. US Census Bureau. Small area income and poverty estimates (SAIPE) program. 2018; <https://www.census.gov/programs-surveys/saipe.html>.
4. US Department of Health and Human Services. End Stage Renal Disease Medical Evidence Report Medicare Entitlement and/or Patient Registration: Form CMS-2728-U3. *Centers for Medicare and Medicaid Services* 2006.
5. US Census Bureau. Annual Resident Population Estimates, Estimated Components of Resident Population Change, and Rates of the Components of Resident Population Change for States and Counties. 2020; <https://www.census.gov/data/tables/time-series/demo/popest/2010s-counties-total.html>. Accessed August 28, 2020.
6. National Center for Health Statistics. Documentation for Revised 2000-2009 Bridged-Race Intercensal Population Estimates for Calculating Vital Rates. 2012; [https://www.cdc.gov/nchs/nvss/bridged\\_race/data\\_documentation.htm](https://www.cdc.gov/nchs/nvss/bridged_race/data_documentation.htm).
7. National Center for Health Statistics. Documentation for Bridged-Race Postcensal Vintage 2017 population estimates for April 1,2010-July 1, 2017. 2018; [https://www.cdc.gov/nchs/data/nvss/bridged\\_race/Documentation\\_bridge\\_postcenv2017.pdf](https://www.cdc.gov/nchs/data/nvss/bridged_race/Documentation_bridge_postcenv2017.pdf).
8. US Department of Agriculture. Urban-Rural Continuum Codes. 2003; <https://www.ers.usda.gov/data-products/rural-urban-continuum-codes.aspx>.
9. US Department of Agriculture. Urban Rural Continuum Codes. 2012; <https://www.ers.usda.gov/data-products/rural-urban-continuum-codes.aspx>.
10. US Department of Agriculture Economic Research Service. County-Level Datasets - Education. 2020; <https://data.ers.usda.gov/reports.aspx?ID=17829>. Accessed August 28, 2020.
11. Bureau of Labor Statistics. Local area unemployment statistics. 2019; <https://www.bls.gov/lau/>. Accessed August 28, 2020.
12. US Census Bureau. Small area health insurance estimates (SAHIE) program. 2019; <https://www.census.gov/programs-surveys/sahie.html>. Accessed August 28, 2020.
13. Institute for Health Metrics and Evaluation. United States Diabetes Prevalence by County 1999-2012. 2019; <http://ghdx.healthdata.org/record/ihme-data/united-states-diabetes-prevalence-county-1999-2012>. Accessed August 28, 2020.
14. US Centers for Disease Control and Prevention. United States Diabetes Surveillance System,. 2019; <https://gis.cdc.gov/grasp/diabetes/diabetesatlas.html#>. Accessed August 28, 2020.
15. Health Resources and Services Administration. Area Health Resource File 2018-2019. 2019; <https://data.hrsa.gov/data/download>. Accessed August 28, 2020.
16. Centers for Medicare and Medicaid Services. Dialysis Facility Compare datasets. 2019; <https://data.medicare.gov/data/dialysis-facility-compare>. Accessed August 28, 2020.
